# Supplementary material for: STAMP2 increases oxidative stress and is critical for prostate cancer
Source: PubMed Central journal article supplement (PMC4364948; doi:10.15252/emmm.201404181), 2015-02-13

Supplementary Figure S6B

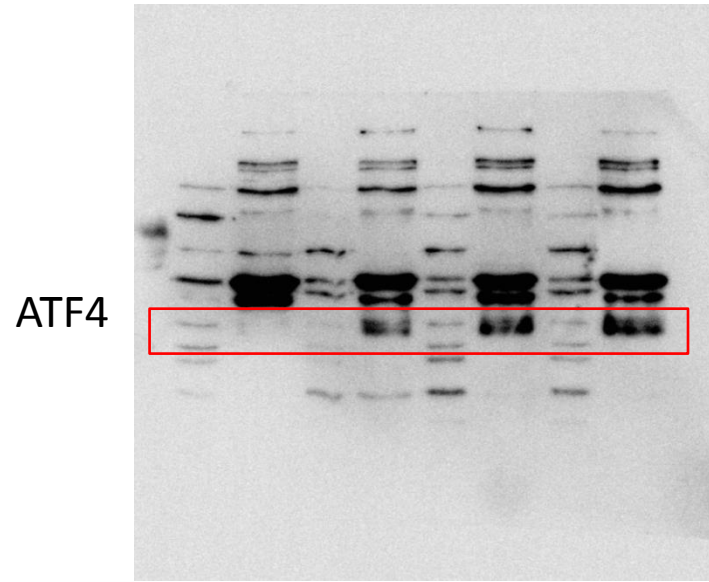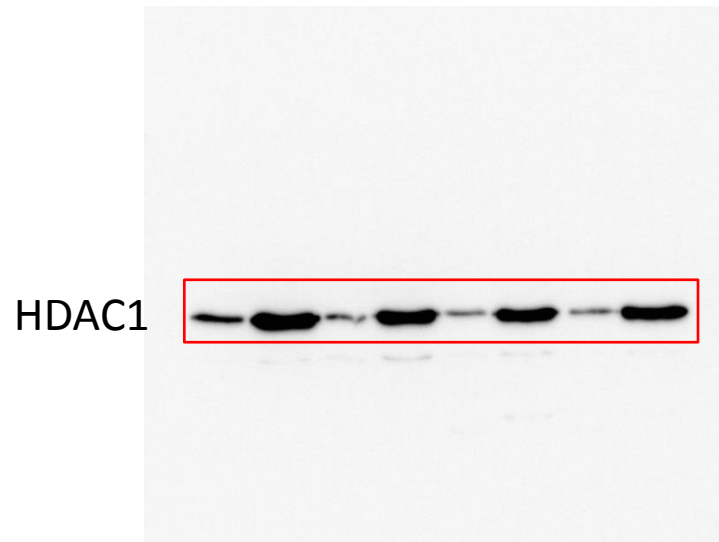

Supplementary Figure S6C

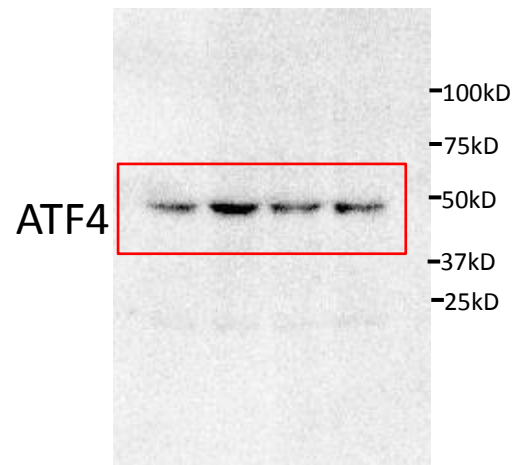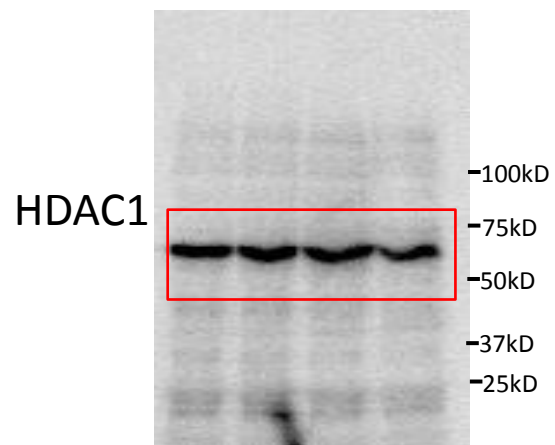

Supplementary Figure S6D

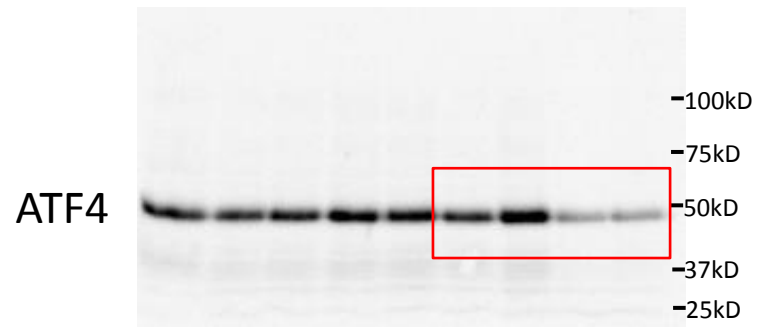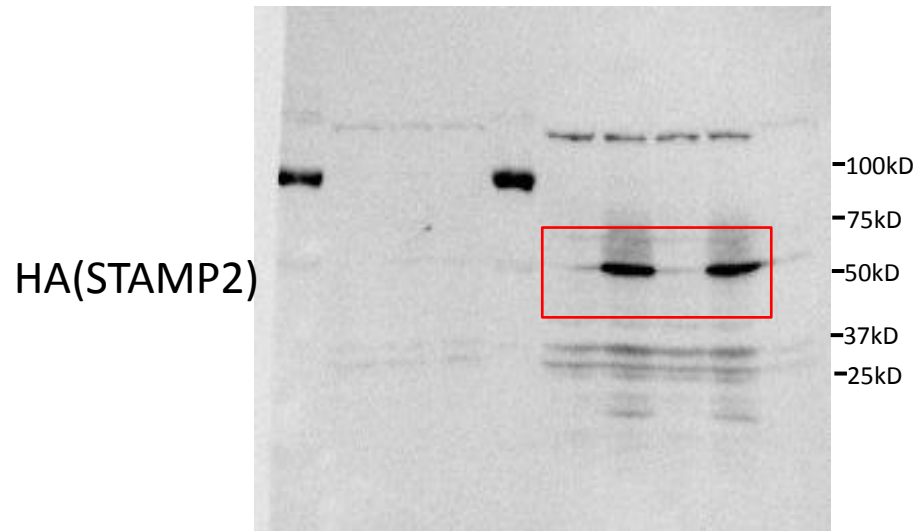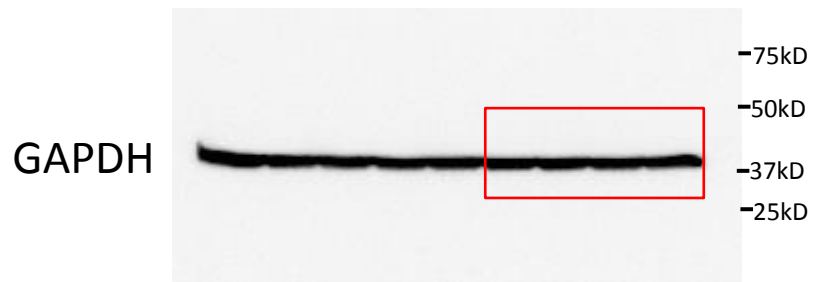

Supplementary Figure S6E

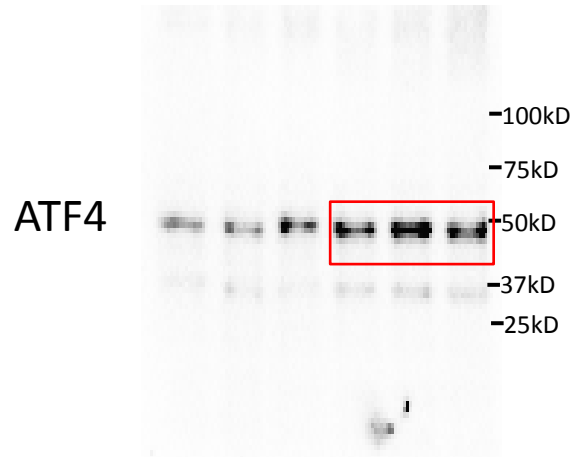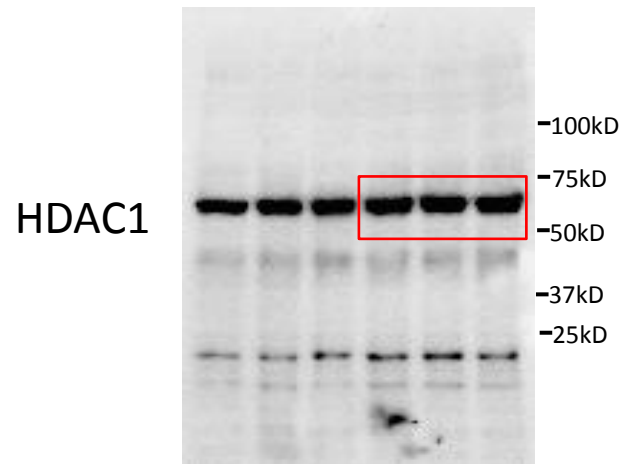

Supplement: emmm0007-0315-sd3.pdf [file emmm0007-0315-sd3.pdf]
