# Supplementary material for: STAMP2 increases oxidative stress and is critical for prostate cancer
Source: PubMed Central journal article supplement (PMC4364948; doi:10.15252/emmm.201404181), 2015-02-13

Figure 3C

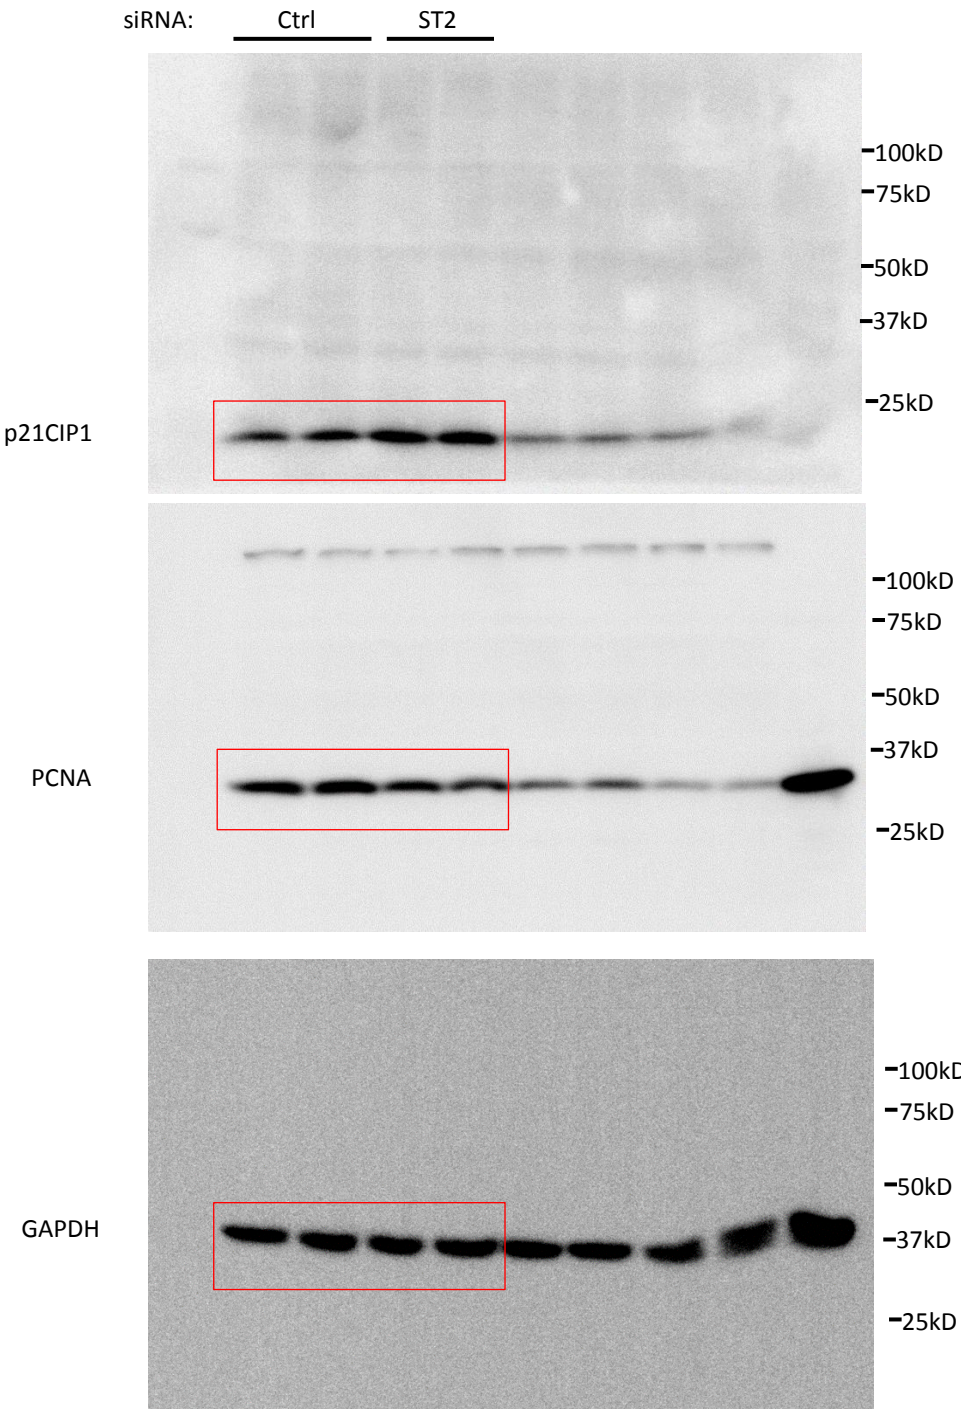

Figure 3F

|        |      |     |       |      |     |       |      |     |       |
|--------|------|-----|-------|------|-----|-------|------|-----|-------|
| siRNA: | Ctrl | ST2 | ST2-2 | Ctrl | ST2 | ST2-2 | Ctrl | ST2 | ST2-2 |
| TRAIL: | +    | +   | +     | +    | +   | +     | -    | -   | -     |
| LY:    | -    | -   | -     | +    | +   | +     | +    | +   | +     |

cleaved PARP

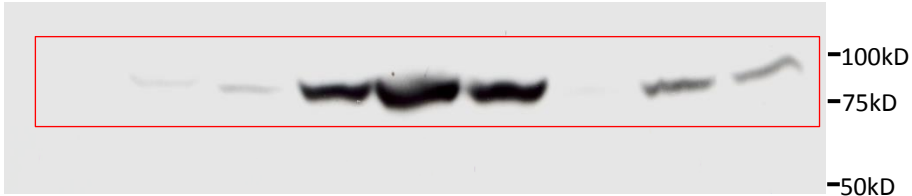

GAPDH

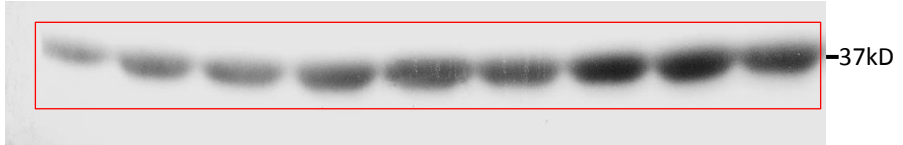

cleaved Caspase-3

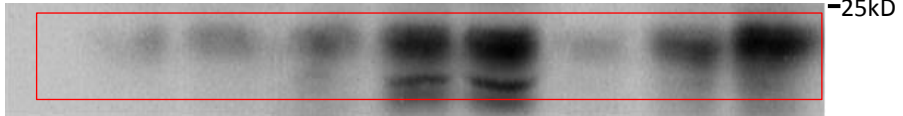

Figure 3G

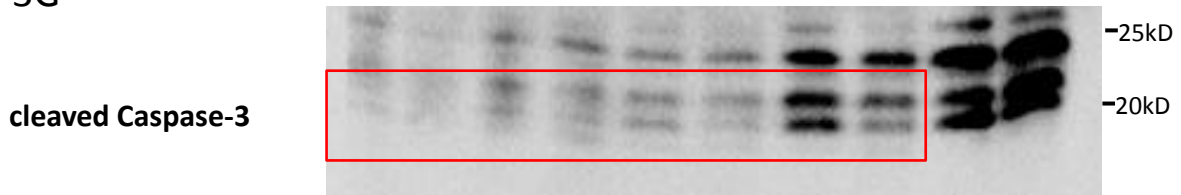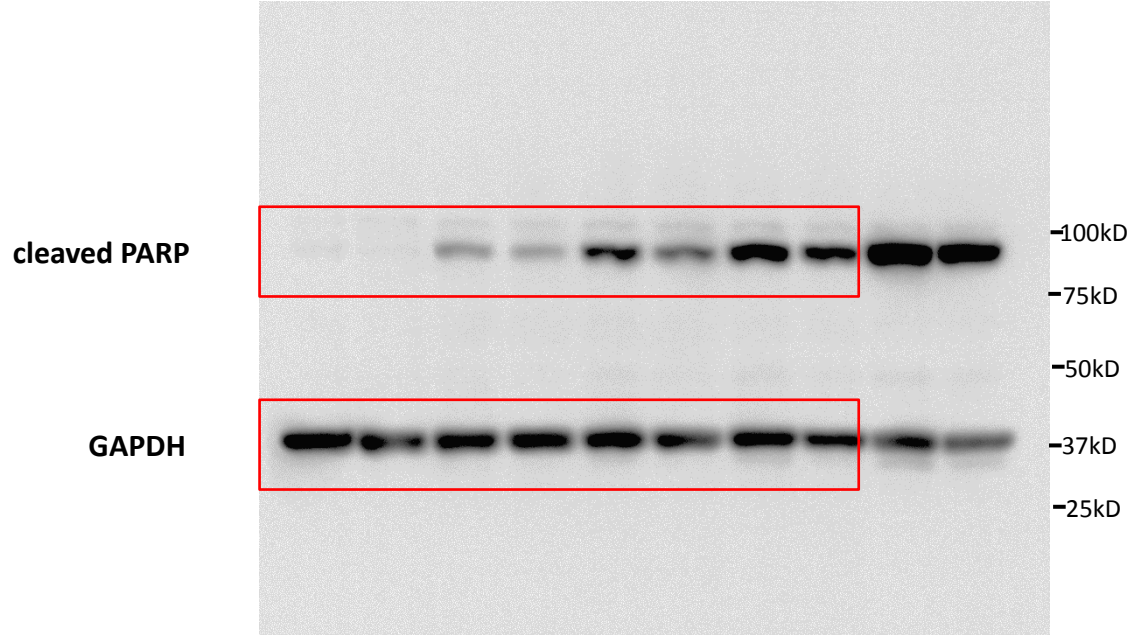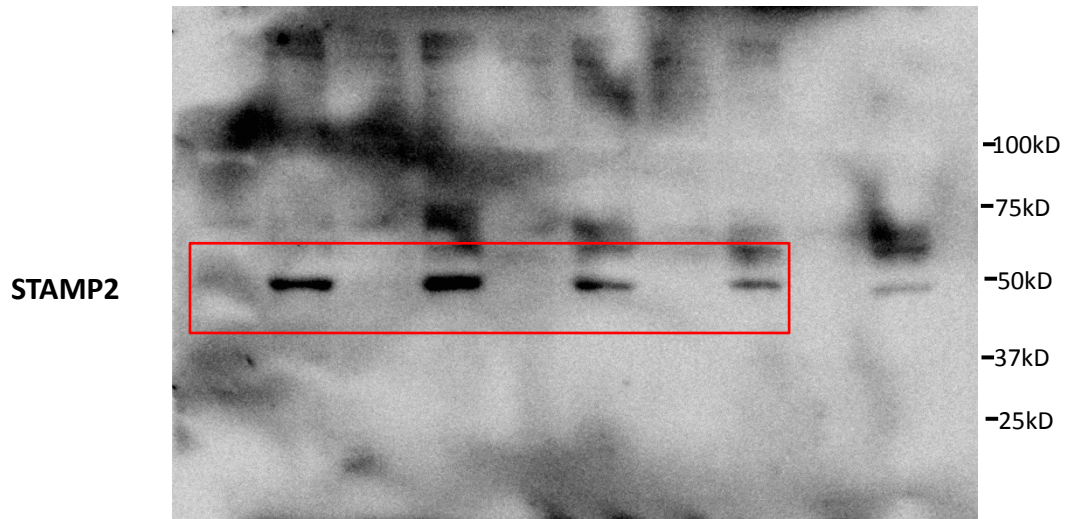

Supplement: emmm0007-0315-sd6.pdf [file emmm0007-0315-sd6.pdf]
