# Supplementary material for: STAMP2 increases oxidative stress and is critical for prostate cancer
Source: PubMed Central journal article supplement (PMC4364948; doi:10.15252/emmm.201404181), 2015-02-13

Figure 7A

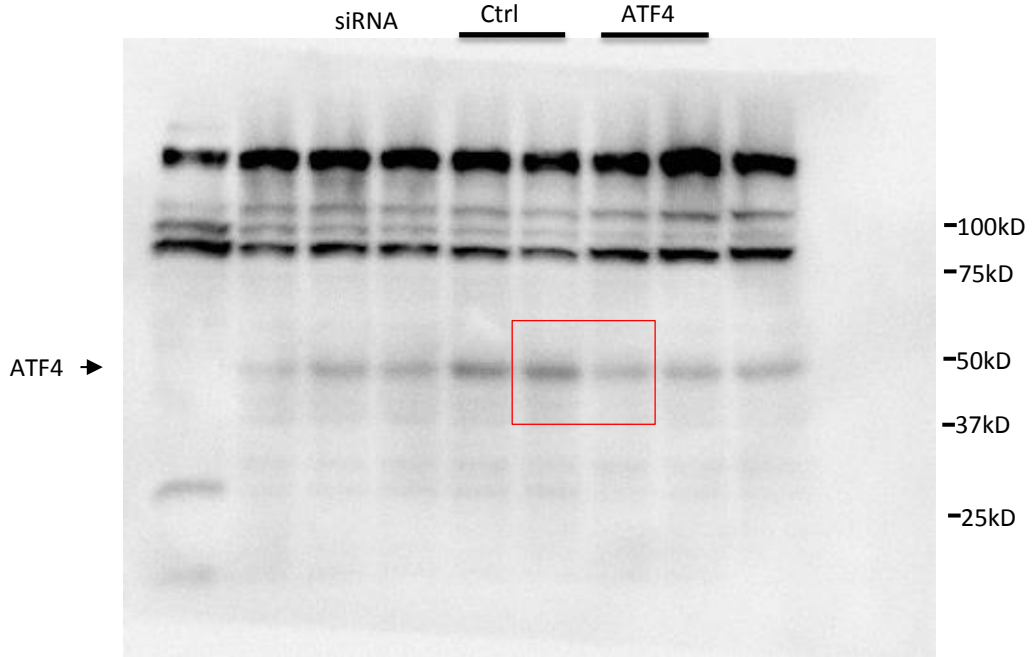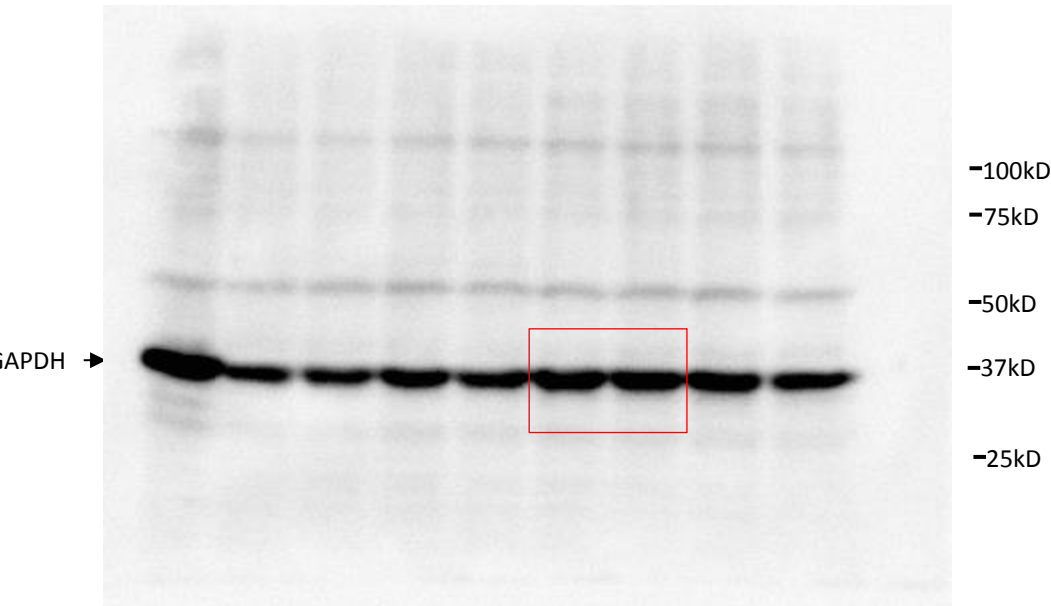

Figure 7D

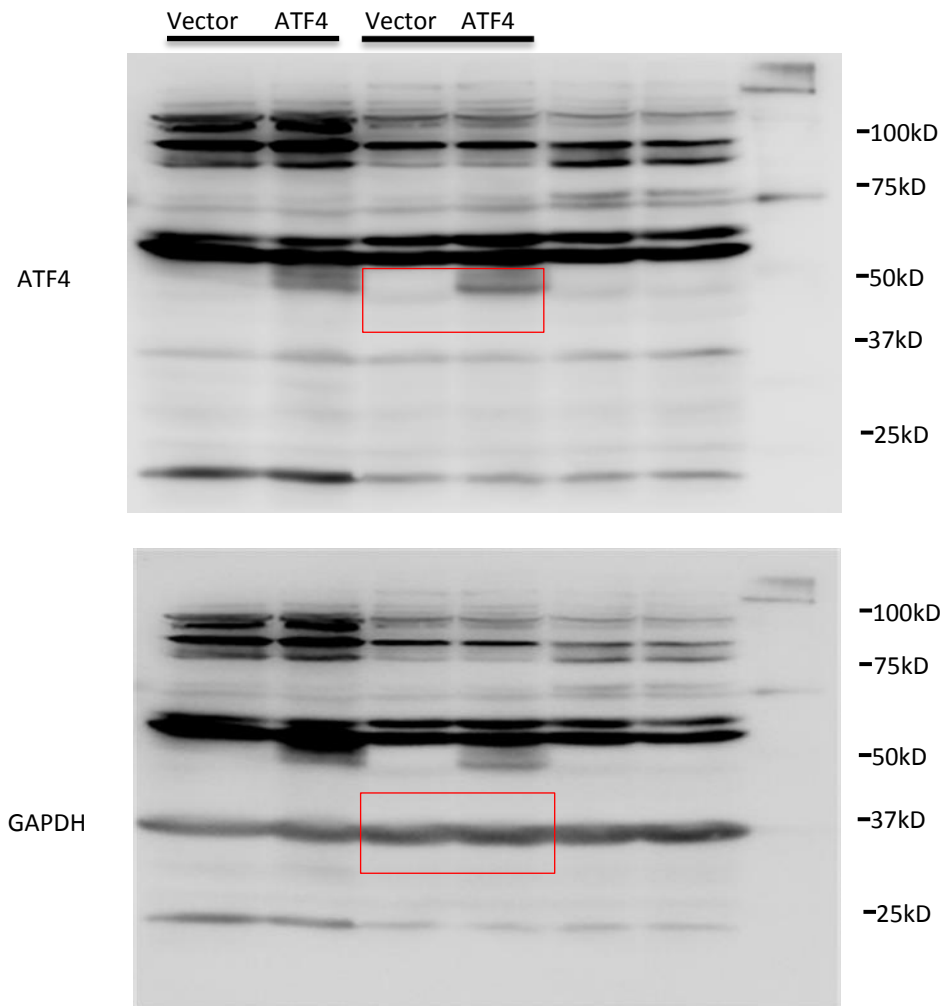

Figure 7G

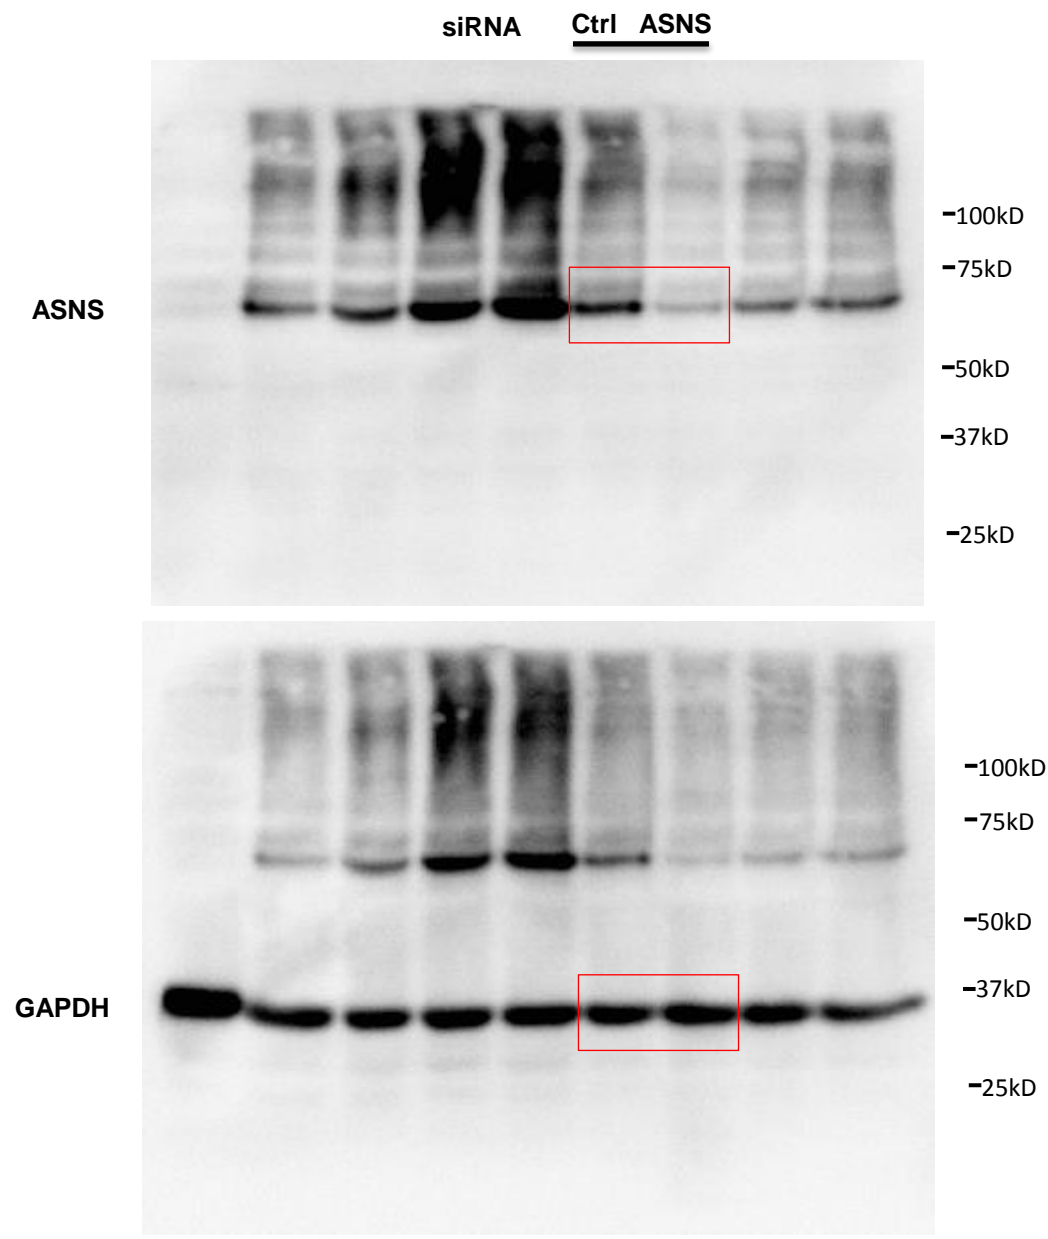

Supplement: emmm0007-0315-sd8.pdf [file emmm0007-0315-sd8.pdf]
